# Supplementary material for: Optimal Preclinical Conditions for Using Adult Human Multipotent Neural Cells in the Treatment of Spinal Cord Injury
Source: PubMed Central journal article supplement (PMC7961778; doi:10.3390/ijms22052579), 2021-03-04
Supplement: ijms-22-02579-s001.pdf [file ijms-22-02579-s001.pdf]

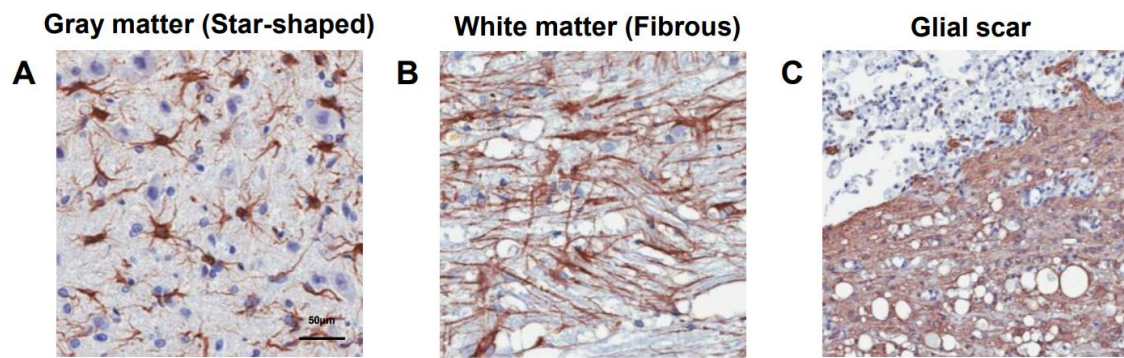

Figure S1. Determination of glial scaring.
